# Supplementary material
Source: PubMed Central journal article supplement (PMC2851858)
Supplement: 1001647107_pnas.201001647SI.pdf [file 1001647107_pnas.201001647SI.pdf]

# Supporting Information

Dunn et al. 10.1073/pnas.1001647107

## SI Materials and Methods

**C. elegans Genetics.** The known Notch pathway alleles used in this study were LG I, *sup-17(n1258ts)* (1, 2); LG III, *sel-8(sa54)* (1, 3), *lin-12(n302)* and *lin-12(n676)* (4, 5), *glp-1(ar202ts)* (6) *glp-1(e2141)* (7) and *glp-1(bn18ts)* (8); LG X, *adm-4* (9). Additional information about these alleles, as well as the incidental mutations *dpy-8(e130)*, *dpy-20(e1282)* and *unc-119(ed3)*, can also be found in Wormbase ([www.wormbase.org](http://www.wormbase.org)).

**C. elegans RNAi.** Individual bacterial strains producing double-stranded RNA (dsRNA) targeting the 21 identified tetraspanin genes were obtained (10) or created. Starved, synchronized, L1-stage *glp-1(ar202)* hermaphrodites were placed on dsRNA-expressing bacteria, and plates were shifted to 25 °C for three days. The production of progeny was evidence of suppression.

**Plasmids Used to Assess Rescue of *tsp-12(ok239)*.** Plasmid p809 was generated by amplifying the genomic region IV: 10149012 to IV: 10151919, containing the *tsp-12* 5' flanking sequence, coding region, and *tsp-12* 3' UTR. A PCR was performed using primers 5'-ATAAGAATGCGGCCGCTCGAGGTGAAATTTTAGTTT TAGATTTGAAATTTATGATTTTCATTTGGAC-3' and 5'-CT GAATCGAATAACTGTTATTTGGAAGATTTAAAGTG-3' with N2 genomic DNA as a template (Table 1). This PCR product was cloned into pCR-XL-TOP (Invitrogen). p809 at 198 ng/μL was bombarded into *unc-119(ed3)* worms along with pDP#MM016b [*C. elegans unc-119(+)*] (11) at 87 ng/μL to generate *arIs119* and *arIs120*.

As a negative control for potential transgene marker effects, we used plasmid p816, which is a transcriptional fusion containing approximately 1.9 kb of the *tsp-12* 5' flanking region fused to *2Xnls::yfp* and the *tsp-12* 3' UTR (details available upon request). p816 at 68 ng/mL was used to generate *arIs135* and

*arIs136* using the same bombardment technique as above by cobombardment with pDP#MM016b, each at 68 ng/mL.

**Cells and Cell Culture.** HeLa cells were grown in DMEM supplemented with 10% FBS, 100 U/mL penicillin G, and 100 μg/mL streptomycin at 37 °C in a humidified atmosphere under 5% CO<sub>2</sub>.

**HeLa Cell RNAi.** siRNA targeting human TSPAN5, TSPAN33, CD9, CD81 and the "AllStars" control siRNA were purchased from Qiagen (catalog numbers SI0415665, SI04249532, SI03650318, SI02777187, and SI02777236).

**Quantitative Real-Time PCR.** Total RNA from HeLa cells was extracted with RNAqueous kit (Ambion) following the manufacturer's instructions (Figs. 1 and 2 and Fig. S1). cDNA was generated with the ThermoScript RT-PCR system (Invitrogen) and analyzed by quantitative real-time PCR using SYBRGreen RT-PCR Core Reagents kit and the 7300 Real-Time PCR System, both from Applied Biosystems. Relative expression levels were based on *GAPDH* levels as reference control. Primer sequences are given here.

*GAPDH* Fw: 5' GAA GGT GAA GGT CGG AGT 3'  
*GAPDH* Rv: 5' GAA GAT GGT GAT GGG ATT TC 3'  
*TSPAN5* Fw: 5' ACCCAGTTTGGCTCTTCCTT 3'  
*TSPAN5* Rv: 5' CAATGTCATCCCGATATGCTC 3'  
*TSPAN33* Fw: 5' CCTCACCGCTGTGTTTCT 3'  
*TSPAN33* Rv: CTGGCCAAAATCAATGAGGT 3'  
*TSPAN33* Rv: CTGGCCAAAATCAATGAGGT 3'  
*CD9* FW: 5' TTGGTGATATTCGCCATTGA 3'  
*CD9* RV: 5' GCATAGTGGATGGCTTTTCAG 3'  
*CD81* FW: 5' TGACCACCTCAGTGCTCAAG 3'  
*CD81* RV: 5' ATGATCACAGCGACCACGAT 3'

1. Tax FE, Thomas JH, Ferguson EL, Horvitz HR (1997) Identification and characterization of genes that interact with *lin-12* in *Caenorhabditis elegans*. *Genetics* 147: 1675–1695.
2. Wen C, Metzstein MM, Greenwald I (1997) SUP-17, a *Caenorhabditis elegans* ADAM protein related to *Drosophila* KUZBANIAN, and its role in LIN-12/NOTCH signalling. *Development* 124:4759–4767.
3. Doyle TG, Wen C, Greenwald I (2000) SEL-8, a nuclear protein required for LIN-12 and GLP-1 signaling in *Caenorhabditis elegans*. *Proc Natl Acad Sci USA* 97:7877–7881.
4. Greenwald I, Seydoux G (1990) Analysis of gain-of-function mutations of the *lin-12* gene of *Caenorhabditis elegans*. *Nature* 346:197–199.
5. Greenwald IS, Sternberg PW, Horvitz HR (1983) The *lin-12* locus specifies cell fates in *Caenorhabditis elegans*. *Cell* 34:435–444.
6. Pepper AS, Killian DJ, Hubbard EJ (2003) Genetic analysis of *Caenorhabditis elegans* *glp-1* mutants suggests receptor interaction or competition. *Genetics* 163:115–132.
7. Priess JR, Schnabel H, Schnabel R (1987) The *glp-1* locus and cellular interactions in early *C. elegans* embryos. *Cell* 51:601–611.
8. Kodoyianni V, Maine EM, Kimble J (1992) Molecular basis of loss-of-function mutations in the *glp-1* gene of *Caenorhabditis elegans*. *Mol Biol Cell* 3:1199–1213.
9. Jarrault S, Greenwald I (2005) Evidence for functional redundancy between *C. elegans* ADAM proteins SUP-17/Kuzbanian and ADM-4/TACE. *Dev Biol* 287:1–10.
10. Kamath RS, et al. (2003) Systematic functional analysis of the *Caenorhabditis elegans* genome using RNAi. *Nature* 421:231–237.
11. Maduro M, Pilgrim D (1995) Identification and cloning of *unc-119*, a gene expressed in the *Caenorhabditis elegans* nervous system. *Genetics* 141:977–988.
